# Supplementary material
Source: Springer Nature journal article supplement (https://www.springermedizin.de/resource/supplementary/13002_2009_155_MOESM1_ESM.pdf/9627276)
Supplement: MOESM1 [file 9627276]

| Scientific name                                                                    | Local name <sup>a</sup>                        | Voucher <sup>b</sup>                            | Preparation                                                                                                                    | Type of Use                                                                                           | Medical use                                                      | Part used                                                                         | Village <sup>c</sup> | Ethnic <sup>d</sup> |
|------------------------------------------------------------------------------------|------------------------------------------------|-------------------------------------------------|--------------------------------------------------------------------------------------------------------------------------------|-------------------------------------------------------------------------------------------------------|------------------------------------------------------------------|-----------------------------------------------------------------------------------|----------------------|---------------------|
| <i>Ageratum conyzoides</i> L.<br>(Asteraceae)                                      | Nga Kiou (L)                                   | Kool 501;<br>518; 634;<br>653                   | Leaves used for steambath and washing                                                                                          | Steambath /<br>Body wash                                                                              | Postpartum<br>recovery                                           | Leaves                                                                            | 8                    | S                   |
| <i>Allium cepa</i> L.<br>(Alliaceae)                                               | Pak Boua (L)                                   | Cultivated                                      | Boiled as vegetable                                                                                                            | Boiled                                                                                                | Postpartum<br>recovery                                           | Plant                                                                             | 9                    | S                   |
| <i>Alpinia galanga</i> (L.)<br>Sw. (Zingiberaceae)                                 | Kga (B,S)                                      | Cultivated                                      | Roasted rhizome eaten                                                                                                          | Eat                                                                                                   | Postpartum<br>recovery                                           | Rhizome                                                                           | 3,8,10               | B,S                 |
| <i>Alpinia</i> spp.<br>(Zingiberaceae)                                             | Kga (L,S); Pa<br>Proung (B)                    | Kool 504;<br>580; ELLA<br>2; 5; 10              | Steambath and washing for<br>recovery <sup>3,4,8,9,10</sup> ; Roasting <sup>7</sup> ; Roasted<br>rhizome eaten <sup>8,10</sup> | Steambath /<br>Body<br>wash <sup>3,4,8,9,10</sup> ;<br>Roasting <sup>7</sup> ;<br>Eat <sup>8,10</sup> | Postpartum<br>recovery                                           | Rhizome <sup>1,4,8</sup> ;<br>Stem <sup>1</sup> ;<br>Leaves <sup>1,3,7,8,10</sup> | 1,3,4,7,8,9<br>,10   | B,S                 |
| <i>Amomum</i><br>cf. <i>microcarpum</i> C.F.<br>Liang & D. Fang<br>(Zingiberaceae) | Mak Neng<br>Kham (L);<br>Same (B)              | Kool 503;<br>HVL 034;<br>ELLA 13;<br>15; 16; 17 | Used for steambath and washing                                                                                                 | Steambath /<br>Body wash                                                                              | Postpartum<br>recovery                                           | Rhizome <sup>3,4,6</sup><br>Stem <sup>1,2,3,4,6</sup><br>Leaves <sup>1,2,8</sup>  | 1,2,3,4,6,8          | B,K,S               |
| <i>Amomum</i> spp.<br>(Zingiberaceae)                                              | Mak Neng<br>Khao                               | Not<br>collected                                | Rhizome used for steambath and<br>washing                                                                                      | Steambath /<br>Body wash                                                                              | Postpartum<br>recovery                                           | Rhizome                                                                           | 1,3                  | B                   |
| <i>Artocarpus</i><br><i>heterophyllus</i> Lam.<br>(Moraceae)                       | Mak Mie (L)                                    | Kool 472;<br>ELLA 50                            | Leaves used for steambath and<br>washing <sup>3</sup> ; Peduncle used for more<br>milk <sup>9</sup>                            | Steambath /<br>Body wash <sup>3</sup> ;<br>Decoction <sup>9</sup>                                     | Postpartum<br>recovery <sup>3</sup> ;<br>Lactagogue <sup>9</sup> | Leaves <sup>3</sup> ;<br>Peduncle <sup>9</sup>                                    | 3,9                  | B,S                 |
| <i>Bambusa bambos</i> (L.)<br>Voss (Poaceae)                                       | Pai Paa (L); Pai<br>Tuan (S)                   | Kool 588                                        | Leaves used for steambath and washing                                                                                          | Steambath /<br>Body wash                                                                              | Postpartum<br>recovery                                           | Leaves                                                                            | 3,8                  | B,S                 |
| <i>Bambusa blumeana</i><br>Schult. & Schult. f.<br>(Poaceae)                       | Pai Baan (L)                                   | Kool 587                                        | Leaves used for steambath and washing                                                                                          | Steambath /<br>Body wash                                                                              | Postpartum<br>recovery                                           | Leaves                                                                            | 3                    | B                   |
| <i>Bambusa tulda</i> Roxb.<br>(Poaceae)                                            | Mai Bong                                       | Not<br>collected                                | Leaves used for steambath and washing                                                                                          | Steambath /<br>Body wash                                                                              | Postpartum<br>recovery                                           | Leaves                                                                            | 3                    | B                   |
| <i>Bischofia javanica</i><br>Blume (Euphorbiaceae)                                 | Som Fat, Boun<br>Fart (L); Ja<br>Lang Deum (K) | Not<br>collected                                | Massage breasts with young leaves                                                                                              | External                                                                                              | Lactagogue                                                       | Leaves                                                                            | 4,6                  | B,K                 |

|                                                                   |                                              |                                 |                                                                                                                                          |                                                           |                                    |                 |              |     |
|-------------------------------------------------------------------|----------------------------------------------|---------------------------------|------------------------------------------------------------------------------------------------------------------------------------------|-----------------------------------------------------------|------------------------------------|-----------------|--------------|-----|
| <i>Blumea balsamifera</i> (L.) DC. (Asteraceae)                   | Bai Naad (L);<br>A Phuak (B);<br>Bu Naek (S) | Kool 614;<br>ELLA 49;<br>57; 78 | Cover bed during roasting for 10-15 days <sup>1,2,9,10</sup> ; Place leaves on coals under bed <sup>4,8</sup>                            | External <sup>1,2,9,10</sup> ;<br>Roasting <sup>4,8</sup> | Postpartum recovery                | Leaves          | 1,2,4,8,9,10 | B,S |
| <i>Brassica juncea</i> (L.) Czern. (Brassicaceae)                 | Pak Khaad (L)                                | Cultivated                      | Boiled as vegetable, against headache and to improve milk                                                                                | Boiled                                                    | Postpartum recovery;<br>Lactagogue | Plant           | 7,8          | S   |
| <i>Brassica oleracea</i> L. (Brassicaceae)                        | Pak Ka Lam (L)                               | Cultivated                      | Boiled as vegetable                                                                                                                      | Boiled                                                    | Postpartum recovery                | Plant           | 7            | S   |
| <i>Calamus rudentum</i> Thwaites (Arecaceae)                      | Boun Wai (L);<br>Njod Woun (S);<br>Pull (K)  | Kool 668                        | Shoots boiled as vegetable (S, K); or grilled (K)                                                                                        | Boiled                                                    | Postpartum recovery                | Shoots          | 6,8,9,10     | K,S |
| <i>Camellia sinensis</i> (L.) Kuntze (Theaceae)                   | Bai Chai (L)                                 | Cultivated                      | Infusion drunk 10 days following parturition                                                                                             | Infusion                                                  | Postpartum recovery                | Leaves          | 3            | B   |
| <i>Centella asiatica</i> (L.) Urb. (Araliaceae)                   | Pak Nok (L)                                  | Kool 523;<br>553                | Treatment of hot fever in babies up to 6 months. Place a handful in a bowl of cold water for 5-30 min, then drink and/or wash the infant | External; Cold extract                                    | Infant care                        | Plant           | 7            | S   |
| <i>Chromolaena odorata</i> (L.) R. M. King & H. Rob. (Asteraceae) | Nga Yerraman (L)                             | Kool 540;<br>632; 648           | Place young leaves on coals <sup>4</sup> ; Cover bed during roasting <sup>1</sup>                                                        | Roasting                                                  | Postpartum recovery                | Leaves          | 1,4          | B   |
| <i>Claoxylon indicum</i> (Reinw. ex Blume) Hassk. (Euphorbiaceae) | Kok Krasell (L); Koh Krasell (S)             | Kool 621;<br>797                | Leaves used for decoction                                                                                                                | Steambath /<br>Body wash                                  | Postpartum recovery                | Leaves          | 9,10         | S   |
| <i>Cyathula prostrata</i> (L.) Blume (Amaranthaceae)              | Tong Chod (L)                                | Not collected                   | Plant used for steambath and washing                                                                                                     | Steambath /<br>Body wash                                  | Postpartum recovery                | Plant           | 6            | K   |
| <i>Dioscorea</i> sp. nov. (Dioscoreaceae)                         | Tha Thaet Tai;<br>Taet Tae                   | Kool 645                        | To treat fever in children. Root used as decoction to wash the infant                                                                    | Decoction                                                 | Infant care                        | Root            | 9            | S   |
| <i>Elaeagnus conferta</i> Roxb. (Elaeagnaceae)                    | Kheua Mak Rod (L)                            | Kool 589                        | To have enough milk if you are breastfeeding several children at the same time                                                           | Decoction                                                 | Lactagogue                         | Leaves;<br>Stem | 8            | S   |

|                                                                                |                                                                       |            |                                                                                                                                                                                                                                                      |                                                                        |                                                                    |                                                                         |          |       |
|--------------------------------------------------------------------------------|-----------------------------------------------------------------------|------------|------------------------------------------------------------------------------------------------------------------------------------------------------------------------------------------------------------------------------------------------------|------------------------------------------------------------------------|--------------------------------------------------------------------|-------------------------------------------------------------------------|----------|-------|
| Unidentified<br>(Euphorbiaceae)                                                | Khamborsouk<br>(B, S)                                                 | Kool 469   | Leaves used for steambath and washing <sup>3a</sup> ; Boil a handful of roots and leaves in a pot of water until the water level has gone down 2 fingers <sup>3b</sup> ; Remove bark through burning and use wood. Not during roasting <sup>10</sup> | Steambath /<br>Body wash <sup>3a</sup> ;<br>Decoction <sup>3b,10</sup> | Postpartum<br>recovery                                             | Leaves <sup>3a,b</sup> ;<br>Roots <sup>3b</sup> ;<br>Wood <sup>10</sup> | 3,10     | B,S   |
| Unidentified<br>(Euphorbiaceae)                                                | Thadrok Ngoua<br>(S)                                                  | Kool 557   | Remove bark through burning and use wood. Not during roasting                                                                                                                                                                                        | Decoction                                                              | Postpartum<br>recovery                                             | Wood                                                                    | 10       | S     |
| <i>Eurycoma longifolia</i><br>Jack (Simaroubaceae)                             | Kok Yik Bor<br>Thong (L)                                              | Kool 595   | To treat rash in infants. Leaves used for decoction used for washing                                                                                                                                                                                 | External                                                               | Infant care                                                        | Leaves                                                                  | 9        | S     |
| <i>Ficus hispida</i> L.f.<br>(Moraceae)                                        | Doua Pong (L);<br>Je Lang Ka Tod<br>(K)                               | Kool 511   | Leaves used for steambath and washing                                                                                                                                                                                                                | Steambath /<br>Body wash                                               | Postpartum<br>recovery                                             | Leaves                                                                  | 6        | K     |
| <i>Gigantochloa parvifolia</i><br>(Brandis ex Gamble)<br>T.Q. Nguyen (Poaceae) | Mai Sod (L);<br>Pho Tiroy (B);<br>Mai Or (S);<br>Balre Pa Choy<br>(K) | Kool 471   | Leaves used for steambath and washing <sup>3,6</sup> ; Shoots boiled as vegetable <sup>9,10</sup>                                                                                                                                                    | Steambath /<br>Body wash <sup>3,6</sup> ;<br>Boiled <sup>9,10</sup>    | Postpartum<br>recovery                                             | Leaves <sup>3,6</sup> ;<br>Shoots <sup>9,10</sup>                       | 3,6,9,10 | B,K,S |
| <i>Globba</i> spp.<br>(Zingiberaceae)                                          | Waen (L);<br>Ngaal (S)                                                | Kool 590   | Rhizome boiled alone or together with Mai Puai. Decoction drunk 2-3 times daily for 2 months to get good milk                                                                                                                                        | Decoction                                                              | Postpartum<br>recovery;<br>Lactagogue                              | Rhizome                                                                 | 8,9      | S     |
| <i>Gonocaryum lobbianum</i><br>(Miers) Kurz<br>(Icacinaeae)                    | Seng Muang<br>(L)                                                     | Kool 470   | Leaves used for steambath and washing <sup>1,3</sup> ; Massage breasts with young leaves <sup>6</sup>                                                                                                                                                | Steambath /<br>Body wash <sup>1,3</sup> ;<br>External <sup>6</sup>     | Postpartum<br>recovery <sup>1,3</sup> ;<br>Lactagogue <sup>6</sup> | Leaves                                                                  | 1,3,6    | B,K   |
| <i>Hedychium</i> sp.<br>(Zingiberaceae)                                        | Saay Houn (L);<br>Je Lang Yaal<br>(K)                                 | Kool 506   | Root eaten as vegetable after birth                                                                                                                                                                                                                  | Boiled                                                                 | Postpartum<br>recovery                                             | Roots                                                                   | 6        | K     |
| <i>Imperata cylindrica</i> (L.)<br>P. Beauv. (Poaceae)                         | Nga Kha (L,B)                                                         | Kool 483   | Entire plant used for steambath and washing                                                                                                                                                                                                          | Steambath /<br>Body wash                                               | Postpartum<br>recovery                                             | Plant                                                                   | 3,6      | B,K   |
| <i>Ipomoea aquatica</i><br>Forssk.<br>(Convolvulaceae)                         | Pak Boung (L)                                                         | Cultivated | Boiled as vegetable                                                                                                                                                                                                                                  | Boiled                                                                 | Postpartum<br>recovery                                             | Plant                                                                   | 7        | S     |

|                                                                                 |                                                                         |                               |                                                                                                                                                                             |                                                                                                        |                                    |                                                 |                    |       |
|---------------------------------------------------------------------------------|-------------------------------------------------------------------------|-------------------------------|-----------------------------------------------------------------------------------------------------------------------------------------------------------------------------|--------------------------------------------------------------------------------------------------------|------------------------------------|-------------------------------------------------|--------------------|-------|
| <i>Knema</i> sp.<br>(Myristicaceae)                                             | Ka Sec R'Jae<br>(K); Kheua<br>Leuad (L)                                 | Kool 500                      | Infusion of the roots is drunk from 2 days up to 2 months after the delivery                                                                                                | Decoction                                                                                              | Postpartum recovery                | Roots                                           | 5,6                | K     |
| <i>Lagerstroemia calyculata</i> Kurz; <i>L. macrocarpa</i> Kurz<br>(Lythraceae) | Mai Puai (L);<br>Koh Raan,<br>Koublau (S);<br>Kun Siliang (B)           | Kool 515;<br>547; 679;<br>837 | Decoction of bark drunk during confinement <sup>4,9,10</sup> ; Take about 30 cm of stem, roast it clean, chop finely, boil, and drink for 1 month postpartum <sup>7,8</sup> | Decoction                                                                                              | Postpartum recovery                | Bark <sup>4,9,10</sup> ;<br>Wood <sup>7,8</sup> | 4,7,8,9,10         | B,S   |
| <i>Lygodium salicifolium</i><br>C. Presl (Lygodiaceae)                          | Pak Kot Kheua<br>(L); Ni Ray<br>Koy (B)                                 | ELLA 26                       | Prevents sickness and dizziness when leaving the bed after the roasting period                                                                                              | Steambath /<br>Body wash                                                                               | Postpartum recovery                | Plant                                           | 2                  | B     |
| <i>Maesa</i> sp.<br>(Myrsinaceae)                                               | Kok Mak<br>Deuan (L); Ko<br>Mak Kok (S)                                 | Kool 543;<br>842              | Boiled roasted wood is drunk                                                                                                                                                | Decoction                                                                                              | Lactagogue                         | Wood                                            | 10                 | S     |
| <i>Mangifera indica</i> L.<br>(Anacardiaceae)                                   | Mak Muang (L)                                                           | Cultivated                    | Leaves used for steambath and washing                                                                                                                                       | Steambath /<br>Body wash                                                                               | Postpartum recovery                | Leaves                                          | 3                  | B     |
| <i>Melicope viticina</i> (Wall.<br>ex Kurtz) T.G. Hartley<br>(Rutaceae)         | Kok Maad (L);<br>Koh Maad (S)                                           | Kool 551;<br>570; 598         | Drink decoction of the leaves <sup>4,9,10</sup> ; Use leaves for roasting <sup>7,8,10</sup> ; Put leaves on bed and rest <sup>10</sup>                                      | Steambath /<br>Body wash <sup>4,9,10</sup> ;<br>Roasting <sup>7,8,10</sup> ;<br>External <sup>10</sup> | Postpartum recovery                | Leaves                                          | 4,7,8,9,10         | B,S   |
| <i>Musa acuminata</i> Colla<br>(Musaceae)                                       | Mak Pie Kuay<br>(L); Eupong<br>(B); Mak Pri<br>(S); Ta Lou Ma<br>La (K) | Not collected                 | Juvenile inflorescence boiled as vegetable                                                                                                                                  | Boiled                                                                                                 | Postpartum recovery;<br>Lactagogue | Flower                                          | 4,5,6,7,8,9,<br>10 | B,K,S |
| <i>Ocimum basilicum</i> L.<br>(Lamiaceae)                                       | Ee Toh Thai<br>(L)                                                      | Cultivated                    | Anthelmintic for infants: Use one handful of leaves and stems. Put in cold water and drink.                                                                                 | Cold extract                                                                                           | Infant care                        | Leaves                                          | 7                  | S     |
| <i>Persea odoratissima</i><br>(Nees) Kosterm.<br>(Lauraceae)                    | Kok Mai Hoom<br>(L)                                                     | ELLA 21                       | Leaves and singed stem for steambath; massage breasts with young leaves                                                                                                     | Steambath /<br>Body wash;<br>External                                                                  | Lactagogue                         | Leaves;<br>Stem                                 | 2                  | B     |

|                                                                                         |                                                  |                                 |                                                                                                                                                                                                                       |                                                                                                |                                                                                      |                                              |                    |       |
|-----------------------------------------------------------------------------------------|--------------------------------------------------|---------------------------------|-----------------------------------------------------------------------------------------------------------------------------------------------------------------------------------------------------------------------|------------------------------------------------------------------------------------------------|--------------------------------------------------------------------------------------|----------------------------------------------|--------------------|-------|
| <i>Phoebe lanceolata</i><br>(Nees) Nees<br>(Lauraceae)                                  | Paivenh (L);<br>Kok Yuang;<br>Kok Tan Tae<br>(S) | Kool 538;<br>619                | Leaves used for steambath and<br>washing <sup>2,3,7</sup> ; Roasting <sup>9</sup>                                                                                                                                     | Steambath /<br>Body wash <sup>2,3,7</sup> ;<br>Roasting <sup>9</sup>                           | Postpartum<br>recovery                                                               | Leaves                                       | 2,3,7,9            | B,S   |
| <i>Piper lolot</i> C. DC.<br>(Piperaceae)                                               | Pak Ieud (L);<br>Prak Leud (S)                   | Kool 478                        | Boiled as vegetable <sup>8a,9,10</sup> ; coalescence <sup>8b</sup> ;<br>To treat hot fever in infants: Apply<br>poultice to the head. Start when the<br>child gets sick and continue up to 3-4<br>months <sup>7</sup> | Steambath /<br>Body wash <sup>8</sup> ;<br>Boiled <sup>8,9,10</sup> ;<br>Poultice <sup>7</sup> | Postpartum<br>recovery <sup>8,9,10</sup> ;<br>Infant care <sup>7</sup>               | Leaves                                       | 7,8,9,10           | S     |
| <i>Polyalthia cerasoides</i><br>(Roxb.) Bedd.<br>(Annonaceae)                           | (Nam) Tao Noi<br>(L)                             | Kool 513;<br>575                | Leaves used for roasting <sup>3</sup> ; Drink a<br>decoction of the wood <sup>2,6</sup>                                                                                                                               | Roasting <sup>3</sup> ;<br>Decoction <sup>2,6</sup>                                            | Postpartum<br>recovery <sup>3,6</sup> ;<br>Recover after<br>miscarriage <sup>2</sup> | Leaves <sup>3</sup> ;<br>Wood <sup>2,6</sup> | 2,3,6              | B,K   |
| <i>Psychotria sarmentosa</i><br>Blume (Rubiaceae)                                       | Van Chod (L);<br>Ko Brao (S);<br>Sala Ba La (K)  | Kool 468;<br>ELLA 3; 22;<br>163 | Drink a decoction of the wood for up to<br>2 months                                                                                                                                                                   | Decoction                                                                                      | Postpartum<br>recovery <sup>1,2,4,6,7,9,10</sup> ;<br>Lactagogue <sup>1</sup>        | Wood                                         | 1,2,4,6,7,9<br>,10 | B,K,S |
| <i>Rhapis laosensis</i> Becc.<br>(Arecaceae)                                            | Kok Sarn (L)                                     | Kool 571                        | Decoction of the root                                                                                                                                                                                                 | Decoction                                                                                      | Recover after<br>miscarriage                                                         | Roots                                        | 2                  | B     |
| <i>Rubus tonkinensis</i> F.<br>Bolle, R.<br><i>cochinchinensis</i> Tratt.<br>(Rosaceae) | Katoum Deng<br>(L)                               | Kool 542;<br>552; 574;<br>631   | Infusion                                                                                                                                                                                                              | Infusion                                                                                       | Menstruation<br>problems                                                             | Leaves                                       | 9                  | S     |
| <i>Sida retusa</i> L.<br>(Malvaceae)                                                    | Nga Khad (B)                                     | Kool 474                        | Entire plant used for steambath and<br>washing                                                                                                                                                                        | Steambath /<br>Body wash                                                                       | Postpartum<br>recovery                                                               | Plant                                        | 3                  | B     |
| <i>Smilax</i> spp.<br>(Smilacaceae)                                                     | Kheua Ya Hua<br>(L); Tang (K)                    | Kool 550;<br>774; 782;<br>824   | Leaves used for steambath and<br>washing <sup>5</sup> ; First day after delivery:<br>remove bark from stem, chop finely,<br>boil and drink 2-3 times <sup>6</sup>                                                     | Steambath /<br>Body wash <sup>5</sup> ;<br>Decoction <sup>6</sup>                              | Postpartum<br>recovery                                                               | Leaves <sup>5</sup> ;<br>Stem <sup>6</sup>   | 5,6                | K     |
| <i>Tacca chantrieri</i> André<br>(Taccaceae)                                            | Kok Tui (L);<br>Touis (K)                        | Kool 505                        | Boiled root eaten postpartum. Bitter                                                                                                                                                                                  | Boiled                                                                                         | Postpartum<br>recovery                                                               | Roots                                        | 5,6                | K     |

|                                                      |                                              |            |                                                                  |                          |                                                       |                 |    |   |
|------------------------------------------------------|----------------------------------------------|------------|------------------------------------------------------------------|--------------------------|-------------------------------------------------------|-----------------|----|---|
| <i>Zingiber officinale</i><br>Roscoe (Zingiberaceae) | Khing (L); Ai<br>Seuj (B)                    | Cultivated | Crush rhizome and put in the ear                                 | External                 | Postpartum<br>recovery<br>(Postpartum<br>haemorrhage) | Rhizome         | 4  | B |
| Unidentified<br>(Zingiberaceae)                      | Koh Pa Kang<br>(L); Ta Kong<br>Kalua (B)     | ELLA 18    | Stops secondary postpartum<br>haemorrhage                        | Decoction                | Postpartum<br>recovery<br>(Postpartum<br>haemorrhage) | Rhizome         | 2  | B |
| Unidentified<br>(Zingiberaceae)                      | Pi Din (L)                                   | ELLA 4     | Stem and leaves used for steambath and<br>washing                | Steambath /<br>Body wash | Lactagogue                                            | Stem;<br>Leaves | 2  | B |
| <i>Ziziphus attopoensis</i><br>Pierre (Rhamnaceae)   | Kham Lang<br>seghon (L); Tha<br>Sua Ghon (S) | Kool 546   | Remove bark through burning and use<br>wood. Not during roasting | Decoction                | Postpartum<br>recovery                                | Wood            | 10 | S |
| <i>Ziziphus oenophila</i> (L.)<br>Mill. (Rhamnaceae) | Kok Lep Meo<br>(L); Si Mu<br>Chong (B)       | Kool 680   | Alleviate postpartum abdominal pain;<br>Expel the placenta       | Decoction                | Postpartum<br>recovery;<br>Parturition                | Wood            | 2  | B |

<sup>a</sup>Languages are abbreviated: Lao (L), Brou (B), Saek (S) and Kry (K). <sup>b</sup>Vouchers of all collections are deposited at the Uppsala University Herbarium (UPS) and the herbarium of the Biology Department, National University of Laos; <sup>c</sup>Villages are numbered: 1. Ka Oy; 2. Mak Feuang; 3. Phung; 4. Koutnae; 5. Maka Tai; 6. Maka Kang; 7. Dteun; 8. Buuk; 9. Nameo; 10. Nameuy; <sup>d</sup>Ethnic groups are abbreviated: Brou (B), villages 1-4; Kry (K), villages 5-6; Saek (S), villages 7-10.
